# Supplementary material for: The nitrite reductase encoded by nirBDs in Pseudomonas putida Y-9 influences ammonium transformation
Source: Front Microbiol. 2022 Oct 12;13:982674. doi: 10.3389/fmicb.2022.982674 (PMC9597696; doi:10.3389/fmicb.2022.982674)
Supplement: Supplementary file 1 [file Data_Sheet_1.xlsx]

## Sheet: Figure1
		TN		NO3-		NO2-		NH4+		OD600		pH
	Time	mean	SD	mean	SD	mean	SD	mean	SD	mean	SD	mean	SD
strain Y-9	0d	123.94	2.4788	16.23	0.8115	0	0	1.02	0.051	0.13	0.0065	7.03	0.1406
	1d	123.94	2.4788	15.38	0.769	0	0	1.51	0.0755	0.98	0.049	7.67	0.1534
	2d	126.18	2.5236	14.68	0.734	0	0	0.35	0.0175	1.48	0.074	8.43	0.1686
	3d	118.28	2.3656	14.32	0.716	0	0	0.32	0.016	1.68	0.084	8.73	0.1746
	4d	105.28	2.1056	14.2	0.71	0	0	0.33	0.0165	1.83	0.0915	8.86	0.1772
△nirBD strain	0d	123.94	2.4788	16.95	0.8475	0	0	0.94	0.047	0.14	0.007	7.06	0.1412
	1d	120.92	2.4184	16.84	0.842	0	0	1.52	0.076	0.89	0.0445	7.59	0.1518
	2d	123.17	2.4634	16.28	0.814	0	0	0.34	0.017	1.41	0.0705	8.39	0.1678
	3d	111.62	2.2324	15.98	0.799	0	0	0.35	0.0175	1.65	0.0825	8.73	0.1746
	4d	106.24	2.1248	15.02	0.751	0	0	0.32	0.016	1.79	0.0895	8.82	0.1764

## Sheet: Figure 2
		TN		NO3-		NO2-		NH4+		OD600		pH
	Time	mean	SD	mean	SD	mean	SD	mean	SD	mean	SD	mean	SD
strain Y-9	0d	119.87	2.3974	0	0	0	0	100.63	5.0315	0.13	0.0065	7.04	0.1408
	1d	117.5	2.35	0	0	0	0	95.62	4.781	0.13	0.0065	7.12	0.1424
	2d	102.13	2.0426	0	0	0	0	24.06	1.203	1.15	0.0575	7.73	0.1546
	3d	99.8	1.996	0	0	0	0	0	0	1.52	0.076	8.6	0.172
	4d	98.38	1.9676	0	0	0	0	0.64	0.032	1.49	0.0745	8.95	0.179
△nirBD strain	0d	119.87	2.3974	0	0	0	0	100.63	5.0315	0.16	0.008	7.09	0.1418
	1d	117.23	2.3446	0	0	0	0	97.49	4.8745	0.22	0.011	8.6	0.172
	2d	104.13	2.0826	0	0	0	0	9.36	0.468	1.49	0.0745	7.92	0.1584
	3d	103.3	2.066	0	0	0	0	0	0	1.49	0.0745	8.63	0.1726
	4d	103.41	2.0682	0	0	0	0	0.3	0.015	1.52	0.076	8.94	0.1788

## Sheet: Figure 3
A	Time	mean	SD
strain Y-9	24h	100.73	6.87754
	34h	19.0581	1.67215
	48h	147.922	15.2265
△nirBD strain	24h	427.309	37.0888
	34h	179.684	15.9771
	48h	320.037	18.0557
B	mean	SD
strain Y-9	0.1114	0.01387
△nirBD strain	0.17207	0.02771

## Sheet: Figure 4
Strain cultured in DM-1
		TN		NO3-		NO2-		NH4+		OD600		pH
	Time	mean	SD	mean	SD	mean	SD	mean	SD	mean	SD	mean	SD
strain Y-9	0d	125.09	2.5018	114.33	5.7165	0	0	0	0	0.09	0.0045	7.04	0.1408
	1d	124.89	2.4978	106.22	5.311	0.06	0.001	0.02	0.001	0.17	0.0085	7.15	0.143
	2d	103.69	2.0738	35.79	1.7895	0.31	0.002	1.82	0.091	1.23	0.0615	7.32	0.1464
	3d	103.23	2.0646	20.49	1.0245	0.17	0.001	3.74	0.187	1.21	0.0605	7.5	0.15
	4d	98.72	1.9744	20.58	1.029	0.14	0.001	4.03	0.2015	1.2	0.06	7.62	0.1524
△nirBD strain	0d	125.09	2.5018	114.33	5.7165	0	0	0	0	0.16	0.008	7.03	0.1406
	1d	125.05	2.501	104.32	5.216	10.06	0.503	0	0	0.24	0.012	7.4	0.148
	2d	125.05	2.501	48.18	2.409	67.67	3.3835	0	0	0.34	0.017	7.33	0.1466
	3d	125.05	2.501	13.92	0.696	100.07	5.0035	0	0	0.35	0.0175	7.44	0.1488
	4d	123.25	2.465	8.75	0.4375	102.23	5.1115	0	0	0.48	0.024	7.6	0.152
Strain cultured in DM-2
		TN		NO3-		NO2-		NH4+		OD600		pH
	Time	mean	SD	mean	SD	mean	SD	mean	SD	mean	SD	mean	SD
strain Y-9	0d	129.69	2.5938	0	0	122.76	6.138	0	0	0.12	0.006	7.03	0.1406
	1d	128.93	2.5786	0	0	121.25	6.0625	0.8	0.04	0.14	0.007	7.06	0.1412
	2d	126.58	2.5316	0	0	118.36	5.918	0.96	0.048	0.17	0.0085	7.12	0.1424
	3d	125.31	2.5062	0	0	115.88	5.794	1.81	0.0905	0.22	0.011	7.23	0.1446
	4d	85.51	1.7102	0	0	40.15	2.0075	2.05	0.1025	1.28	0.064	8.29	0.1658
△nirBD strain	0d	129.69	2.5938	0	0	122.76	6.138	0	0	0.15	0.0075	7.02	0.1404
	1d	128.56	2.5712	0	0	120.85	6.0425	0	0	0.19	0.0095	7.03	0.1406
	2d	125.52	2.5104	0	0	117.54	5.877	0	0	0.23	0.0115	7.18	0.1436
	3d	123.11	2.4622	0	0	115.06	5.753	0	0	0.29	0.0145	7.31	0.1462
	4d	120.84	2.4168	0	0	112.71	5.6355	0	0	0.35	0.0175	7.49	0.1498

## Sheet: Figure 5
Strain cultured in SND-1
		TN		NO3-		NO2-		NH4+		OD600		pH
	Time	mean	SD	mean	SD	mean	SD	mean	SD	mean	SD	mean	SD
strain Y-9	0d	250.42	5.0084	123.98	6.199	0	0	97.54	4.877	0.11	0.0055	6.98	0.1396
	1d	242.86	4.8572	112.3	5.615	0	0	92.75	4.6375	0.11	0.0055	7.08	0.1416
	2d	233.24	4.6648	110.64	5.532	0	0	31.63	1.5815	1.12	0.056	7.73	0.1546
	3d	230.26	4.6052	97.55	4.8775	6.84	0.342	8.09	0.4045	1.49	0.0745	8.49	0.1698
	4d	223.77	4.4754	95.89	4.7945	6.83	0.3415	7.67	0.3835	1.51	0.0755	8.92	0.1784
△nirBD strain	0d	250.42	5.0084	123.98	6.199	0	0	97.54	4.877	0.14	0.007	6.91	0.1382
	1d	244.48	4.8896	119.48	5.974	0	0	89.76	4.488	0.21	0.0105	7.16	0.1432
	2d	242.49	4.8498	111.31	5.5655	2.2	0.11	8.27	0.4135	1.52	0.076	8.07	0.1614
	3d	238.53	4.7706	54.44	2.722	57.11	2.8555	5.66	0.283	1.49	0.0745	8.67	0.1734
	4d	234.01	4.6802	51.71	2.5855	61.54	3.077	4.02	0.201	1.48	0.074	8.97	0.1794
Strain cultured in SND-2
		TN		NO3-		NO2-		NH4+		OD600		pH
	Time	mean	SD	mean	SD	mean	SD	mean	SD	mean	SD	mean	SD
strain Y-9	0d	239.99	4.7998	0	0	122.87	6.1435	91.38	4.569	0.12	0.006	6.96	0.1392
	1d	239.85	4.797	0	0	120.46	6.023	91.47	4.5735	0.13	0.0065	7.03	0.1406
	2d	239.46	4.7892	0	0	119.46	5.973	91.7	4.585	0.16	0.008	7.11	0.1422
	3d	233.28	4.6656	0	0	115.51	5.7755	92.82	4.641	0.18	0.009	7.21	0.1442
	4d	226.8	4.536	0	0	108.12	5.406	47.78	2.389	0.95	0.0475	7.82	0.1564
△nirBD strain	0d	239.99	4.7998	0	0	122.87	6.1435	91.38	4.569	0.16	0.008	6.97	0.1394
	1d	240	4.8	0	0	119.07	5.9535	91.28	4.564	0.18	0.009	7.04	0.1408
	2d	239.42	4.7884	0	0	119.01	5.9505	89.7	4.485	0.21	0.0105	7.15	0.143
	3d	233.7	4.674	0	0	117.46	5.873	80.83	4.0415	0.43	0.0215	7.41	0.1482
	4d	230.91	4.6182	0	0	115.13	5.7565	2.29	0.1145	1.46	0.073	8.47	0.1694
